1 **Crystal structure of SARS-CoV-2 nucleocapsid protein RNA binding domain**  
2 **reveals potential unique drug targeting sites**

3 Sisi KANG<sup>1</sup>, Mei YANG<sup>1</sup>, Zhongsi HONG<sup>2</sup>, Liping ZHANG<sup>3</sup>, Zhaoxia HUANG<sup>1</sup>, Xiaoxue CHEN<sup>1</sup>,  
4 Suhua HE<sup>1</sup>, Ziliang ZHOU<sup>1</sup>, Zhechong ZHOU<sup>1</sup>, Qiuyue CHEN<sup>1</sup>, Yan YAN<sup>1</sup>, Changsheng ZHANG<sup>3</sup>,  
5 Hong SHAN<sup>1,4,5,\*</sup>, Shoudeng CHEN<sup>1,4,6,\*</sup>

6 1. Molecular Imaging Center, Guangdong Provincial Key Laboratory of Biomedical Imaging, The Fifth  
7 Affiliated Hospital, Sun Yat-sen University, 519000, Zhuhai, China.

8 2. Department of Infectious Diseases, The Fifth Affiliated Hospital, Sun Yat-sen University, 519000, Zhuhai,  
9 China.

10 3. Key Laboratory of Tropical Marine Bio-resources and Ecology, Guangdong Key Laboratory of Marine  
11 Materia Medica, Institution of South China Sea Ecology and Environmental Engineering, South China Sea  
12 Institute of Oceanology, Chinese Academy of Sciences, 164 West Xingang Road, 510301, Guangzhou,  
13 China.

14 4. Guangdong Provincial Engineering Research Center of Molecular Imaging, the Fifth Affiliated Hospital,  
15 Sun Yat-sen University, 519000, Zhuhai, China

16 5. Department of Interventional Medicine, the Fifth Affiliated Hospital, Sun Yat-sen University, 519000,  
17 Zhuhai, China

18 6. Department of Experimental Medicine, The Fifth Affiliated Hospital, Sun Yat-sen University, 519000,  
19 Zhuhai, China.

20 **Correspondence:**

21 \* Shoudeng CHEN: ( [chenshd5@mail.sysu.edu.cn](mailto:chenshd5@mail.sysu.edu.cn) ; Tel: +86-13612221254) or

22 \* Hong SHAN ( [shanhong@mail.sysu.edu.cn](mailto:shanhong@mail.sysu.edu.cn) ; Tel: +86-18207306672 )

23 **Abstract**

24 The outbreak of coronavirus disease (COVID-19) in China caused by SARS-CoV-2 virus  
25 continually lead to worldwide human infections and deaths. It is currently no specific viral protein  
26 targeted therapeutics yet. Viral nucleocapsid protein is a potential antiviral drug target, serving  
27 multiple critical functions during the viral life cycle. However, the structural information of SARS-  
28 CoV-2 nucleocapsid protein is yet to be clear. Herein, we have determined the 2.7 Å crystal  
29 structure of the N-terminal RNA binding domain of SARS-CoV-2 nucleocapsid protein.  
30 Although overall structure is similar with other reported coronavirus nucleocapsid protein N-  
31 terminal domain, the surface electrostatic potential characteristics between them are distinct.  
32 Further comparison with mild virus type HCoV-OC43 equivalent domain demonstrates a unique  
33 potential RNA binding pocket alongside the  $\beta$ -sheet core. Complemented by *in vitro* binding  
34 studies, our data provide several atomic resolution features of SARS-CoV-2 nucleocapsid  
35 protein N-terminal domain, guiding the design of novel antiviral agents specific targeting to  
36 SARS-CoV-2.

37 **Key words:** COVID-19, Coronavirus, SARS-CoV-2, Nucleocapsid protein, RNA binding domain,  
38 Crystal structure, Antiviral targeting site

## 39 Main Text

### 40 Introduction

41 The ongoing outbreak of coronavirus disease 2019 (COVID-19) is a new emerging human  
42 infectious disease caused by a novel coronavirus (severe acute respiratory syndrome coronavirus  
43 2, SARS-CoV-2, previously known as 2019-nCoV). As of 28 February 2020, a cumulative total of  
44 78,961 COVID-19 cases were confirmed with 2791 deaths in China. The emerged global  
45 epidemic spread rapidly with 4691 confirmed cases and 67 deaths across 51 countries outside  
46 of China (COVID-19 situation Report WHO, 28 Feb 2020). Despite remarkable efforts on  
47 containing spread of the virus, there is no specific targeted therapeutic currently.

48 SARS-CoV-2 is a betacoronavirus with single-stranded RNA genomes, like MERS-CoV and  
49 SARS-CoV. The first two-thirds of viral 30kb RNA genome, mainly named as ORF1a/b region,  
50 translates into two polyproteins (pp1a and pp1ab) and encodes most of the non-structural  
51 proteins (nsp). The rest parts of virus genome encode accessory proteins and four essential  
52 structural proteins, including spike (S) glycoprotein, small envelope (E) protein, matrix (M)  
53 protein, and nucleocapsid (N) protein<sup>1,2</sup>. Current antiviral drugs developed to treat coronavirus  
54 (CoV) infections primarily target S protein, the 3C-like (3CL) and papain-like (PLP) proteases<sup>3,4</sup>.  
55 Because mutant viruses in the S protein is prone to escape the targeted therapeutic with  
56 different host-cell receptor binding patterns<sup>4</sup>, as well as antibody-dependent enhancement  
57 (ADE) effects of S protein antibodies are found in MERS coronavirus<sup>5</sup>, there are several limitations  
58 on targeting S protein for antiviral approaches. Antiviral protease inhibitors may nonspecifically

59 act on the cellular homologous protease, resulting in host cell toxicity and severe side effects.  
60 Therefore, novel antiviral strategies are needed to combat acute respiratory infections caused  
61 by this novel coronavirus SARS-CoV-2.

62 The CoV N protein is a multifunctional RNA-binding protein necessary for viral RNA  
63 transcription and replication. It plays many pivotal roles in forming helical ribonucleoproteins  
64 during packaging the RNA genome, regulating viral RNA synthesis during replication,  
65 transcription and modulating infected cell metabolism<sup>6-8</sup>. The primary functions of N protein are  
66 binding to the viral RNA genome, and packing them into a long helical nucleocapsid structure  
67 or ribonucleoprotein (RNP) complex<sup>9,10</sup>. *In vitro* and *in vivo* experiments revealed that N protein  
68 bound to leader RNA, and was critical for maintaining highly ordered RNA conformation suitable  
69 for replicating, and transcribing the viral genome<sup>7,11</sup>. More studies implicated that N protein  
70 regulated host-pathogen interactions, such as actin reorganization, host cell cycle progression,  
71 and apoptosis<sup>12-14</sup>. The N protein is also a highly immunogenic and abundantly expressed protein  
72 during infection, capable of inducing protective immune responses against SARS-CoV and  
73 SARS-CoV-2<sup>15-18</sup>.

74 The common domain architectures of coronavirus N protein are consisting of three distinct but  
75 highly conserved parts: An N-terminal RNA-binding domain (NTD), a C-terminal dimerization  
76 domain (CTD), and intrinsically disordered central Ser/Arg (SR)-rich linker. Previous studies have  
77 revealed that the NTD are responsible for RNA binding, CTD for oligomerization, and (SR)-rich  
78 linker for primary phosphorylation, respectively<sup>19-23</sup>. The crystal structures of SARS-CoV N-NTD<sup>24</sup>,

79 infectious bronchitis virus (IBV) N-NTD<sup>25,26</sup>, HCoV-OC43 N-NTD<sup>20</sup> and mouse hepatitis virus  
80 (MHV) N-NTD<sup>27</sup> have been solved. The CoVs N-NTD have been found to associate with the 3'  
81 end of the viral RNA genome, possibly through electrostatic interactions. Additionally, several  
82 critical residues have been identified for RNA binding and virus infectivity in the N-terminal  
83 domain of coronavirus N proteins<sup>24,27-29</sup>. However, the structural and mechanistic basis for newly  
84 emerged novel SARS-CoV-2 N protein remain largely unknown. Understanding these aspects  
85 should facilitate the discovery of agents that specifically block the coronavirus replication,  
86 transcription and viral assembly<sup>30</sup>.

87 At present work, we report the crystal structure of SARS-CoV-2 nucleocapsid N-terminal  
88 domain (termed as SARS-CoV-2 N-NTD), as a model for understanding the molecular  
89 interactions that govern SARS-CoV-2 N-NTD binding to ribonucleotides. Compared with other  
90 solved CoVs N-NTD, we characterized the specificity surface electrostatic potential features of  
91 SARS-CoV-2 N-NTD. Additionally, we further demonstrated the unique RNA binding site  
92 characteristics. Our findings will aid in the development of new drugs that interfere with viral N  
93 protein and viral replication in SARS-CoV-2, and highly related virus SARS-CoV.

## 94 **Materials and methods**

### 95 **Cloning, expression and purification**

96 The SARS-CoV-2 N-FL plasmid is a gift from Guangdong Medical Laboratory Animal Center.

97 We designed several constructs including: SARS-CoV-2 N-FL (residues from 1 to 419), SARS-

98 CoV-2 N-NTD domain (residues from 41 to 174) and SARS-CoV-2 N-NTD domain (residues  
99 from 33 to 180) depending on secondary structure predictions and sequence conservation  
100 characteristics. The constructs were cloned into the pRSF-Duet-1 vector with N-terminal 6xHis-  
101 SUMO tag and expressed in *E. coli* strain *Rosetta*. SARS-CoV-2 N-NTD was induced with 0.1mM  
102 IPTG and incubated overnight at 16 °C in TB media. After Ni column chromatography followed  
103 by Ulp1 protease digestion for tag removal, SARS-CoV-2 N-NTD (41-174) proteins were further  
104 purified via size-exclusion chromatography (with buffer consisting of 20 mM Tris-HCl (pH 8.0),  
105 150 mM sodium chloride, 1 mM dithiothreitol), and then concentrated by ultrafiltration to a final  
106 concentration of 22 mg/mL.

107 **Crystallization and data collection** Crystals were grown by the sitting drop method with 0.3 $\mu$ l  
108 protein (22 mg/mL) mixed with 0.6  $\mu$ L and 0.3  $\mu$ L well solution using Mosquito crystallization  
109 robot and after 3 days initial crystallization was performed under 16 °C under 20 mM sodium  
110 acetate, 100 mM sodium cacodylate (pH 6.5), 26 % PEG8000 conditions. Crystals were frozen in  
111 liquid nitrogen in reservoir solution supplemented with 15 % glycerol (v/v) as a cryoprotectant.  
112 X-ray diffraction data were collected at the South China Sea Institute of Oceanology, Chinese  
113 Academy of Sciences by Rigaku X-ray diffraction (XRD) instruments. The structure was solved  
114 by molecular replacement using PHENIX software suite<sup>31</sup>. The X-ray diffraction and structure  
115 refinement statistics are summarized in Table 1.

116 **SPR Analysis.** Surface plasmon resonance (SPR) analysis was performed using a Biacore T200  
117 with the CM5 sensor chip (GE Healthcare) at room temperature (25 °C). SARS-CoV-2 N-NTD

118 (41–174) were exchanged into PBS buffer via gel-filtration. The CM5 chip surface was activated  
119 for 10 min using 0.2 M EDC/ 0.05 M NHS. After the injection of 30  $\mu\text{g}/\text{mL}$  protein in 10 mM  
120 sodium acetate (pH 5.5) for three times to immobilize on one of channels of the CM5 chip up  
121 to  $\sim 5,800$  response units, 10  $\mu\text{L}$  of 1 M ethanolamine (pH 8.0) was used for blocking the  
122 remaining activated groups. Each of the analytes (AMP, GMP, UMP, CMP) were dissolve in PBS  
123 (pH 7.4, 0.05 % NP-20) and flowed through the chip surface at flow rate of 30  $\mu\text{L}/\text{min}$  at 25  $^{\circ}\text{C}$ .  
124 30  $\mu\text{L}$  analytes were injected for affinity analysis with 60 s dissociation time. To understanding  
125 dose dependent affinity of analytes and SARS-CoV-2 N-NTD, we tested nine dilutions of  
126 analytes from 0.15625 mM to 10 mM. A blank flow channel was used as a reference channel to  
127 correct the bulk refractive index by subtracting the response signal of the reference channel  
128 from the signals of protein immobilized cells. The equilibrium constant ( $K_D$ ) for analytes binding  
129 to SARS-CoV-2 N-NTD was determined from the association and dissociation curves of the  
130 sensorgrams, using the BIAevaluation program (Biacore).

## 131 **Results**

### 132 **Sequence features of SARS-CoV-2 nucleocapsid protein**

133 It is reported that the complete genome of SARS-CoV-2 (MN908947, Wuhan-Hu-1 coronavirus)  
134 is 29.9 kb in length, similarly to 27.9 kb SARS-CoV and 30.1 kb MERS-CoV genome<sup>32,33</sup> (Fig. 1A).  
135 Nucleocapsid (N) protein is translated from the 3' end structural ORF<sup>34-36</sup>. According to Virus  
136 Variation Resource in National Center for Biotechnology Information databank<sup>37</sup>, SARS-CoV-2  
137 N protein encoding region are conserved among the known NCBI 103 genome datasets. Only  
138 a few variations (S194L in virus strain Foshan/20SF207/2020, K249I in virus strain Wuhan/IVDC-  
139 HB-envF13-21/2020, P344S in virus strain Guangzhou/20SF206/2020) in N protein are found in  
140 public genomic epidemiology. An overall domain architecture of N protein among four  
141 coronaviruses (SARS-CoV-2, SARS-CoV, MERS-CoV and HCoV-OC43) are shown in Figure 1B,  
142 which indicates that SARS-CoV-2 shares typical characteristics with other coronaviruses. Zoom  
143 into the completed genomic sequence of SARS-CoV-2 N protein encoding region, we find that  
144 the sequence identities between SARS-CoV-2 with SARS-CoV, MERS-CoV, and HCoV-OC43  
145 are 89.74%, 48.59%, 35.62%, respectively (Fig. S1)<sup>38,39</sup>. Since full-length SARS-CoV-2 N protein  
146 aggregated status were found in our expression and purification studies (Fig. S2), as well as  
147 previous reported data on other coronavirus nucleocapsid protein, we next investigate the  
148 structural studies on N-terminal region of SARS-CoV-2 N protein (termed as SARS-CoV-2 N-  
149 NTD).

### 150 **Crystal structure of SARS-CoV-2 N-NTD**



151 In order to obtain the atomic information of SARS-CoV-2 N-NTD, we solve the structure at 2.7  
152 Å resolution using X-ray crystallography technology. Briefly, 47-173 residues of SARS-CoV-2 N  
153 protein were constructed, expressed and purified as described protocol (Materials and Methods).  
154 The structure of SARS-CoV-2 N-NTD was determined by molecular replacement using the  
155 SARS-CoV N-NTD structure (PDB:2OG3) as the search model<sup>24</sup>. The final structure was refined  
156 to R-factor and R-free values of 0.26 and 0.29, respectively. The complete statistics for data  
157 collection, phasing and refinement are presented in Table 1. Unlike to SARS-CoV N-NTD crystals  
158 packing modes (monoclinic form at 2OFZ, cubic form at 2OG3)<sup>24</sup>, SARS-CoV-2 N-NTD crystal  
159 shows orthorhombic crystal packing form with four N-NTD monomers in one asymmetry unit  
160 (Fig. 2A). Although lacks of evidence for real RNP organization in the mature virions, the  
161 differences in the crystal packing patterns may implicate other potential contacts in SARS-CoV-  
162 2 RNP formation process. All four monomers in one asymmetric unit of the SARS-CoV-2 N-  
163 NTD crystal structure shared similar right-handed (loops)-(β-sheet core)-(loops) sandwiched  
164 structure, as conserved among the CoVs N-NTD (Fig. 2B). The β-sheet core is consisted of five  
165 antiparallel β-strands with a single short  $3_{10}$  helix just before strand β2, and a protruding β-  
166 hairpin between strands β2 and β5. The β-hairpin is functionally important for CoV N-NTD,  
167 implicated in mutational analysis of amino acid residues for RNA binding<sup>29</sup> (Fig. 2C). The SARS-  
168 CoV-2 N-NTD is enriched in aromatic and basic residues, folding into a hand shape resembles  
169 with basic fingers that extend far beyond the β-sheet core, a basic palm, and an acidic wrist (Fig.  
170 2D).

## 171 **Comparison of SARS-CoV-2 N-NTD with related viral N-NTD structures**

172 To obtain more specific information, we first mapped the conserved residues between SARS-  
173 CoV-2 N-NTD with SARS-CoV N-NTD, MERS-CoV N-NTD, HCoV-OC443 N-NTD, respectively  
174 (Fig 3A). The most conserved residues distribute on the basic palm region (Fig. 3A, blue and  
175 green region), while the less conserved residues locate in basic fingers and acidic wrist region  
176 (Fig. 3A, pink and red region). The available CoVs N-NTD crystal structures allowed us to  
177 compare the electrostatic potential on the surface. As shown in Fig. 3B, although CoV N-NTDs  
178 all adapted similar overall organizations, the surface charge distribution patterns are different.  
179 Consistent with our observations, previous modeling of related coronaviral N-NTDs also shown  
180 markedly differ in surface charge distributions<sup>24</sup>. Superimposition of SARS-CoV-2 N-NTD with  
181 three kinds of CoVs N-NTD are shown in Fig. 3C. Compared with SARS-CoV N-NTD, SARS-  
182 CoV-2 N-NTD show a 2.1 Å movement in the  $\beta$ -hairpin region forward to nucleotide binding  
183 site (Fig. 3C, left panel). While compared with MERS-CoV N-NTD, SARS-CoV-2 N-NTD show a  
184 less extended  $\beta$ -hairpin region, and a distinct relax N-terminal tail (Fig. 3C, middle panel). In  
185 consistently, SARS-CoV-2 N-NTD show a distinct relax N-terminal tail, and a 2 Å movement in  
186 the  $\beta$ -hairpin region backward to the opposite side of nucleotide binding site when the structure  
187 is compared with HCoV-OC43 N-NTD (Fig. 3C, right panel). These differences dramatically  
188 change the surface characterizations of the protein, may result in the RNA-binding cleft being  
189 adaptive to its own RNA genome.

## 190 **A potential unique drug target pocket in SARS-CoV-2 N-NTD**

191 Although there are several CoV N-NTDs structures have been solved, the structural basis for

192 ribonucleoside 5' -monophosphate binding of N protein had only been described in HCoV-  
193 OC43, a relative type typically causing mild cold symptoms<sup>40</sup>. Since the surface characterizations  
194 of N-NTD between SARS-CoV-2 with HCoV-OC43 are distinct, we next explored the differences  
195 of RNA binding mechanistic basis with superimposition analysis. Previous studies had shown  
196 that, HCoV-OC43 N-NTD contained Adenosine monophosphate (AMP)/ uridine  
197 monophosphate (UMP)/ cytosine monophosphate (CMP)/ guanosine monophosphate (GMP)  
198 binding site alongside the middle two  $\beta$  strands of its  $\beta$ -sheets core<sup>40</sup>. In the complex structure  
199 of HCoV-OC43 N-NTD with ribonucleotides, the phosphate group was bound by Arg 122 and  
200 Gly 68 via ionic interactions, the pentose sugar ribose 2' -hydroxyl group was recognized by  
201 Ser 64 and Arg164, the nitrogenous base inserted into a hydrophobic pocket consisting of Phe  
202 57, Pro61, Tyr 63, Tyr102, Tyr 124, and Tyr 126, mainly interacted with Tyr 124 via  $\pi$ - $\pi$  stacking  
203 forces (Fig. S3). It is proposed that this ribonucleotide binding mechanism are essential for all  
204 coronavirus N proteins, applying to develop CoV N-NTD-target agents.

205 To obtain the structure information of SARS-CoV-2 N-NTD ribonucleotide binding site, we  
206 make a superimposition of SARS-CoV-2 N-NTD with HCoV-OC43 N-NTD-AMP complex. As  
207 expectedly, the root mean square deviation (RMSD) between these two structure coordinates  
208 are 1.4 Å over 136 superimposed C $\alpha$  atoms. However, a number of difference around the  
209 ribonucleotide binding site were shown as superimposition of SARS-CoV-2 N-NTD with HCoV-  
210 OC43 N-NTD. The major difference is N-terminal tail of N-NTD with sequence variation (SARS-  
211 CoV-2: 48 **NNTA** 51 versus HCoV-OC43: 60 **VPYY** 63). In HCoV-OC43 N-NTD, the tail folded  
212 up to compose a nitrogenous base binding channel, whereas this region extended outward in

213 SARS-CoV-2 one (Fig. 4A). The N-terminal tail movement contributed to the change of N-NTD  
214 surface charge distribution, at which nucleotide binding cavity became easier to accessible in  
215 SARS-CoV-2 N-NTD (Fig. 4B and C). The second difference is on phosphate group binding site,  
216 which SARS-CoV-2 N-NTD have larger sidechain residues (55 **TA** 56) compared with HCoV-  
217 OC43 N-NTD equivalents (67 **SG** 68) (Fig. 4D). Structural superimposition suggested additional  
218 polar properties of Thr 55 and Ala 56 in SARS-CoV-2 N-NTD may increase the steric clash with  
219 ribonucleotide phosphate moiety (Fig. 4E and F). The third difference is on the edge of  
220 nitrogenous base recognized hydrophobic pocket, where SARS-CoV-2 N-NTD had Arg 89  
221 residues compared with HCoV-OC43 N-NTD Tyr 102 equivalents (Fig. 4G). The change of these  
222 residues sidechain may lead to dramatic decreasing of non-polar properties and increasing of  
223 polar properties in the nitrogenous base binding site (Fig. 4H and I). To evaluate these different  
224 observations in our structure, Surface plasmon resonance (SPR) analysis experiments were next  
225 performed to assess the binding affinity between SARS-CoV-2 N-NTD with all four kinds of  
226 ribonucleotide AMP/UMP/CMP/GMP. Intriguingly, all ribonucleoside 5' -monophosphate,  
227 excepted for GMP ( $K_b$  value is 8 mM), shown little binding signals in assays (Fig. S4). Taken  
228 together, the above results suggested a potential distinct RNA binding patterns between SARS-  
229 CoV-2 N protein with HCoV-OC43 N protein.

## 230 **Discussion**

231 Structure-based drug discovery has been shown to be an advance approach for the  
232 development of new therapeutics. Many ongoing studies are developed to treat COVID-19

233 primarily targeting the spike protein, viral proteases (3C-like protease and papain-like protease).  
234 However, there is little effective targeted therapeutic currently. Recent studies demonstrated  
235 that N proteins will be a good drug-targeting candidate in other CoVs since they process several  
236 critical functions, such as RNA genomic packing, viral transcription and assembly, in the  
237 infectious cell<sup>10</sup>. However, the molecular basis of SARS-CoV-2 N protein is yet to be elucidated.  
238 Here, we present the 2.7 Å crystal structure of SARS-CoV-2 N protein N-terminal domain,  
239 revealing the specific surface charge distributions which may facilitate drug discovery specifically  
240 to SARS-CoV-2 N protein ribonucleotide binding domain.

241 On the structural basis of SARS-CoV-2 N-NTD, several residues in the ribonucleotide binding  
242 domain were found to distinctly recognize the CoV RNA substrates. The N-terminal tail residues  
243 (Asn 48, Asn 49, Thr 50, and Ala 51) is more flexible and extended outward compared with  
244 equivalent residues in HCoV-OC43 N-NTD, possibly opening up the binding pocket into fitting  
245 with viral RNA genomic high order structure. Residues Arg 89, instead of HCoV-OC43 N-NTD  
246 Tyr 102, may contribute to guanosine base recognition despite the overall ribonucleotide  
247 binding may be excluded by residues Thr 55 and Ala 56 in the phosphate moiety recognition  
248 site.

249 Up to date, seven coronaviruses have been identified as human-susceptible virus, among which  
250 HCoV-229E, HCoV-NL63, HCoV-HKU1 and HCoV-OC43 with low pathogenicity cause mild  
251 respiratory symptoms similar to common cold, whereas the other three betacoronaviruses,  
252 SARS-CoV-2, SARS-CoV and MERS-CoV lead to severe and potential fatal respiratory tract

253 infections<sup>32,41,42</sup>. Previous study reported the structural basis of HCoV-OC43 N-NTD with AMP,  
254 GMP, UMP, CMP and a virtual screening-base compound PJ34. However, our data suggested  
255 that SARS-CoV-2 employed a unique pattern for binding RNA with atomic resolution  
256 information. The structure not only help us to understand the RNA-binding mechanisms  
257 between severe infectious coronavirus with mild infectious one, but also guide the design of  
258 novel antiviral agents specific targeting to SARS-CoV-2.

## 259 **Acknowledgments**

260 We thank for Guangdong Medical Laboratory Animal Center for providing the N-protein  
261 encoding gene plasmids, Dr. Yongzhi Lu from Guangzhou Institutes of Biomedicine and Health  
262 (Chinese Academy of Sciences) for the initial crystals X-ray diffraction screening, supports from  
263 Dr. Xuan Ma of South China Sea Institute of Oceanology (Chinese Academy of Sciences) for  
264 home source X-ray diffraction facility. This work was supported by National Natural Science  
265 Foundation of China (31770801) and Special Fund for Scientific and Technological Innovation  
266 Strategy of Guangdong Province of China (2018B030306029, 2017A030313145) to S.C.

## 267 **Conflict of interest**

268 The authors declare no conflict of interest

## 269 **Data Availability Statement**

270 The structures in this paper are deposited to the Protein Data Bank with 6M3M access code.

271 **Figures**

272 **Figure 1: Sequence features of SARS-CoV-2 nucleocapsid protein**

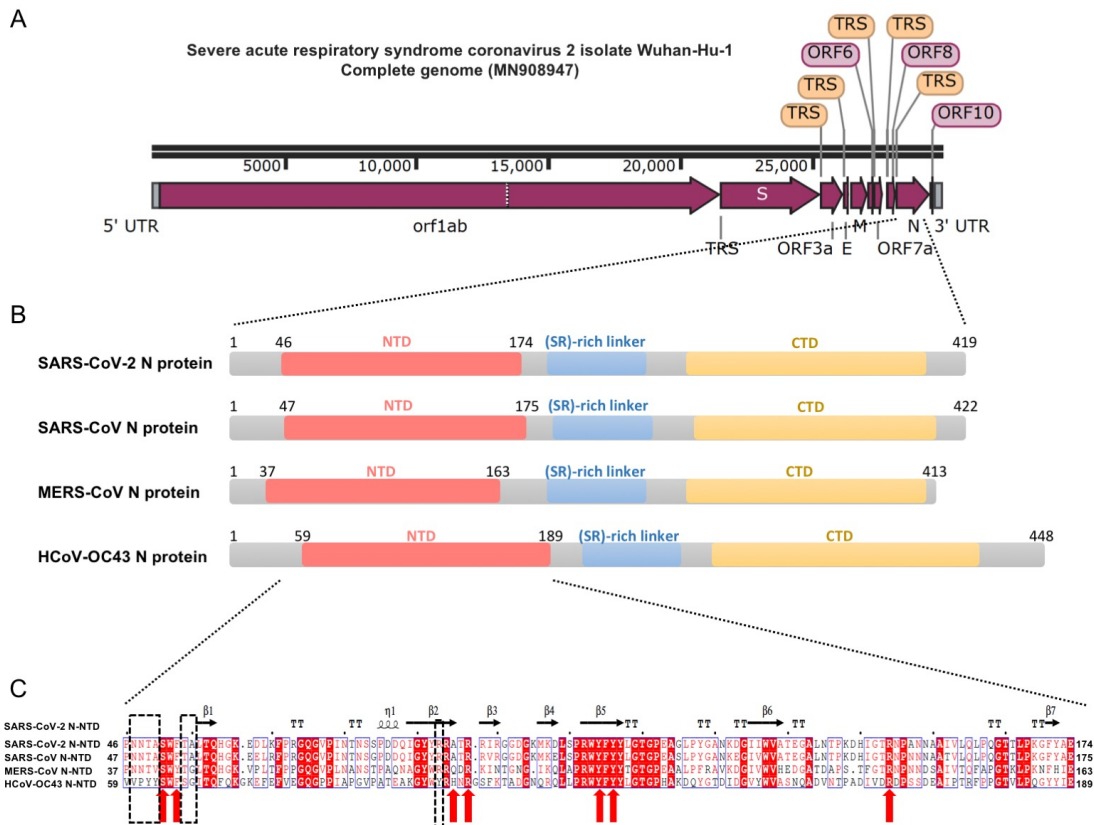

273 **Figure legend: A.** The complete whole genomic features of SARS-CoV-2 isolate Wuhan-Hu-1  
 274 (Genebank: MN908947). UTR: untranslated region; orf/ORF: open reading frame; TRS:  
 275 transcriptional regulatory sequences; S: spike glycoprotein encoding region; E: envelope protein  
 276 encoding region; M: membrane protein encoding region; N: nucleocapsid protein encoding  
 277 region. The figure is illustrated by SnapGene Viewer; **B.** Domain architectures of coronavirus  
 278 nucleocapsid protein. NTD: N-terminal RNA-binding domain; CTD: C-terminal dimerization  
 279 domain; **C.** Multiple sequence alignment of SARS-CoV-2 N-NTD with SARS-CoV N-NTD  
 280 (UniProtKB: P59595), MERS-CoV N-NTD (UniProtKB: R9UM87), HCoV-OC43 N-NTD (UniProtKB:

281 P33469). Red arrows indicate conserved residues for ribonucleotide binding site, dash boxes  
282 indicate variably residues in the structural comparisons.



283 **Figure 2: Structural overview of SARS-CoV-2 N-NTD**

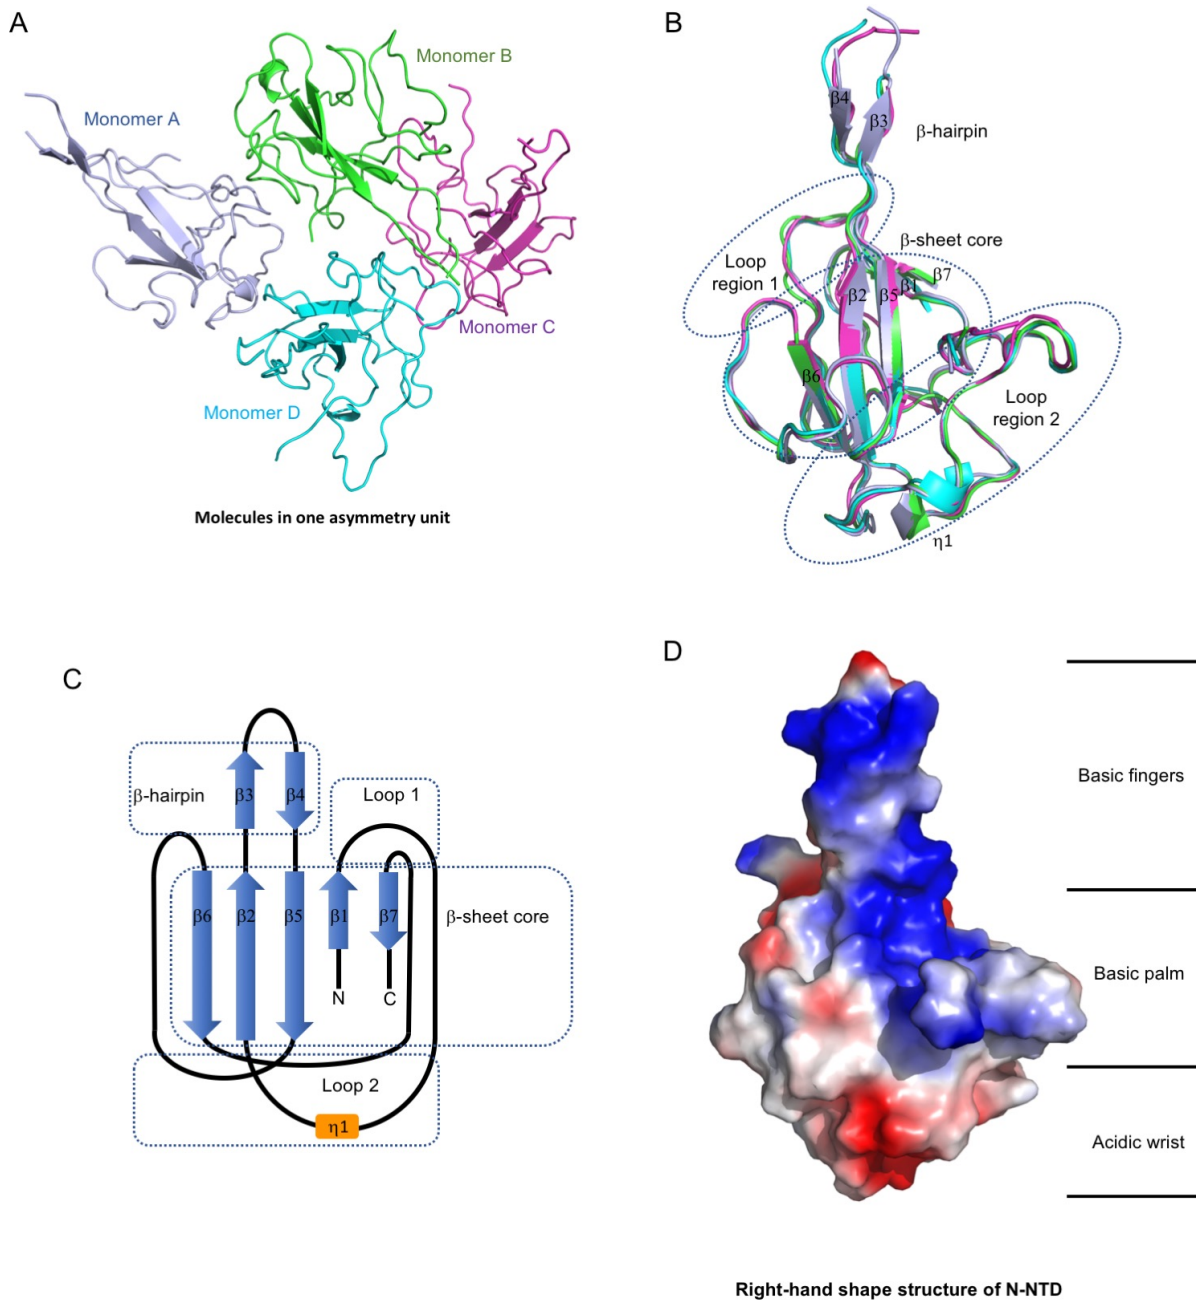

284 **Figure legend:** **A.** Ribbon representation of SARS-CoV-2 N-NTD molecules in one asymmetric  
285 unit. The four molecules are highlighted with different color respectively; **B.** Superimpositions of  
286 four molecules in one asymmetric unit. The dash circles indicate the sandwiched structure  
287 composed of Loop region 1,  $\beta$ -sheet core, and Loop region 2. The  $\beta$ -strand is labeled with  $\beta$ 1

288 to  $\beta 7$ , the  $3_{10}$  helix is labeled with  $\eta 1$ ; **C.** Topological style illustration of SARS-CoV-2 N-NTD  
289 structure; **D.** Electrostatic surface of the SARS-CoV-2 N-NTD. Blue denotes positive charge  
290 potential, while red indicates negative charge potential. The potential distribution was calculated  
291 by Pymol. The values range from -5 kT (red) to 0 (white) and to +5 kT, where k is the Boltzmann  
292 constant and T is the temperature.

293 **Figure 3: Comparison of SARS-CoV-2 N-NTD with related viral N-NTD structures**

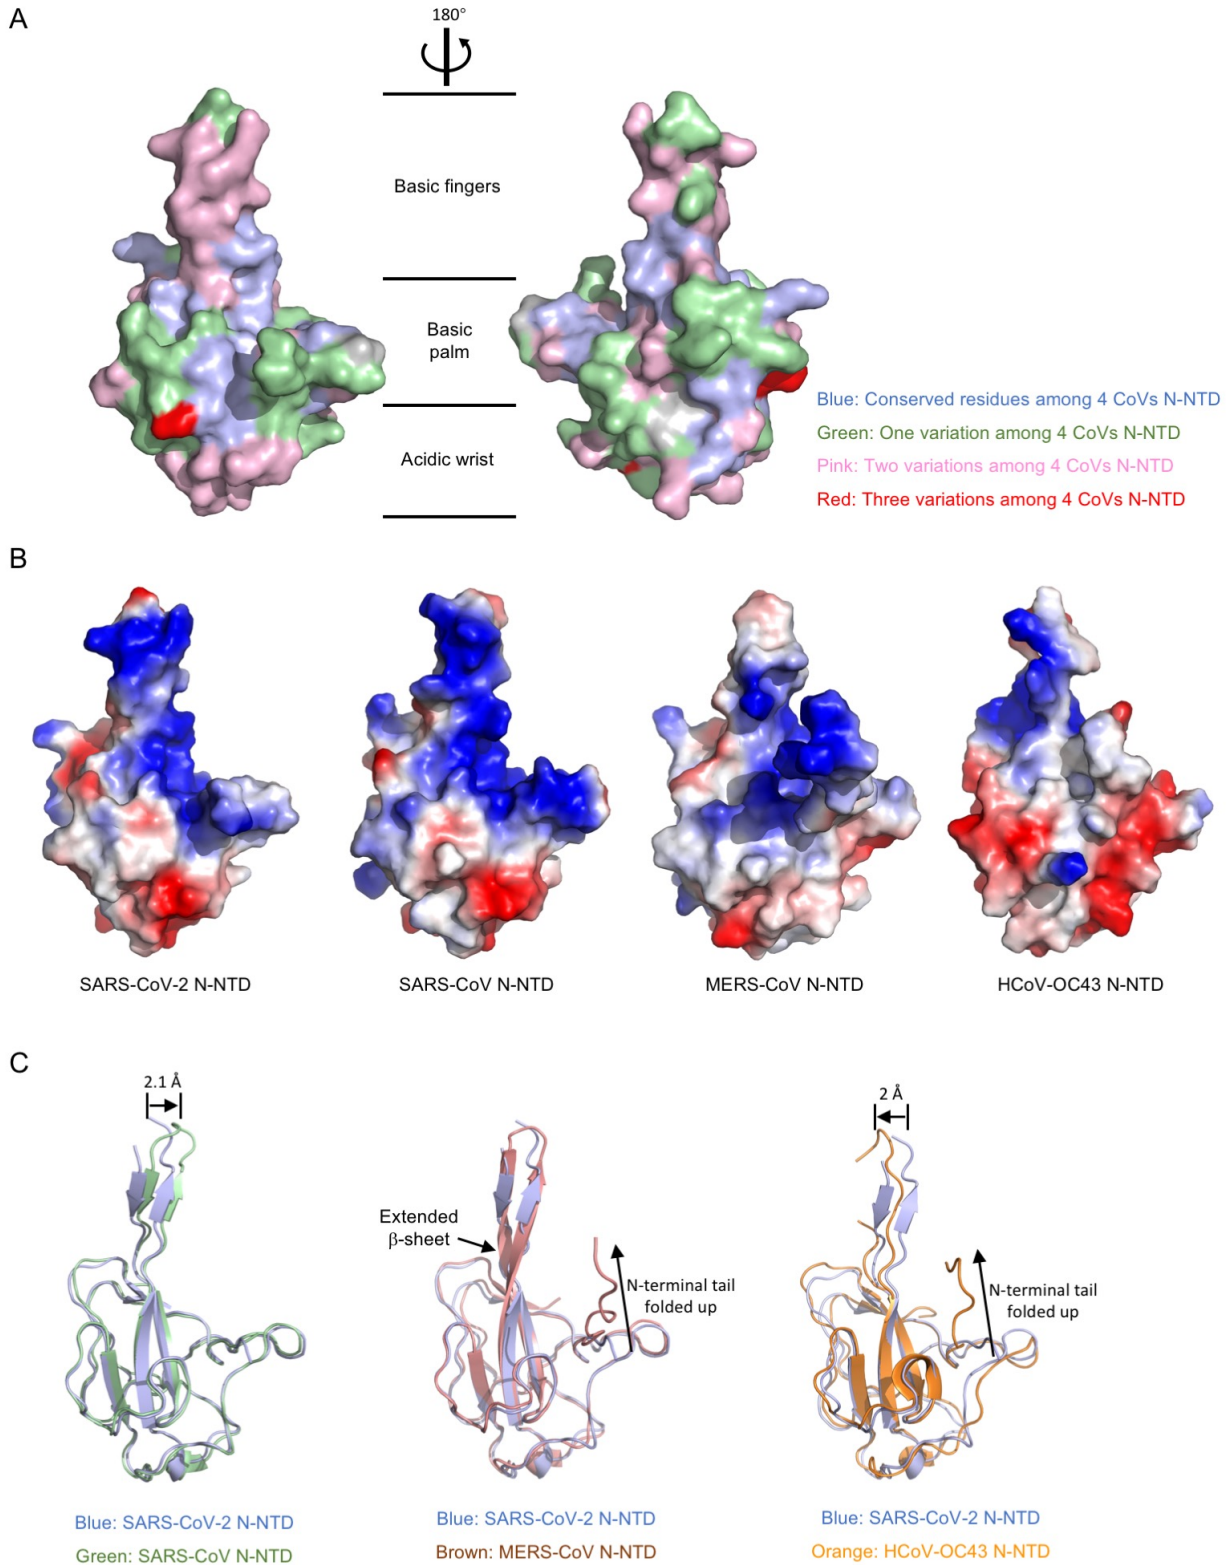

294 **Figure legend: A.** Mapping the conserved surfaces of four CoV N-NTDs in SARS-CoV-2 N-

295 NTD structure. The multiple sequence alignment used for mapping is shown in Fig. 1C. Blue  
296 denotes conserved residues among 4 CoVs N-NTD; green denotes one variation among 4 CoVs  
297 N-NTD; pink denotes two variations among 4 CoVs N-NTD; red denotes three variations among  
298 4 CoVs N-NTD; **B.** Electrostatic surface of the SARS-CoV-2 N-NTD, SARS-CoV N-NTD, MERS-  
299 CoV N-NTD, HCoV-OC43 N-NTD. Blue denotes positive charge potential, while red indicates  
300 negative charge potential; **C.** Overall structural comparison of SARS-CoV-2 N-NTD with related  
301 viral N-NTD structures. Left: superimposition of SARS-CoV-2 N-NTD (blue) to SARS-CoV N-  
302 NTD (green); middle: superimposition of SARS-CoV-2 N-NTD (blue) to MERS-CoV N-NTD  
303 (brown); right: superimposition of SARS-CoV-2 N-NTD (blue) to HCoV-OC43 N-NTD (orange).

304 **Figure 4: A potential unique drug target pocket in SARS-CoV-2 N-NTD**

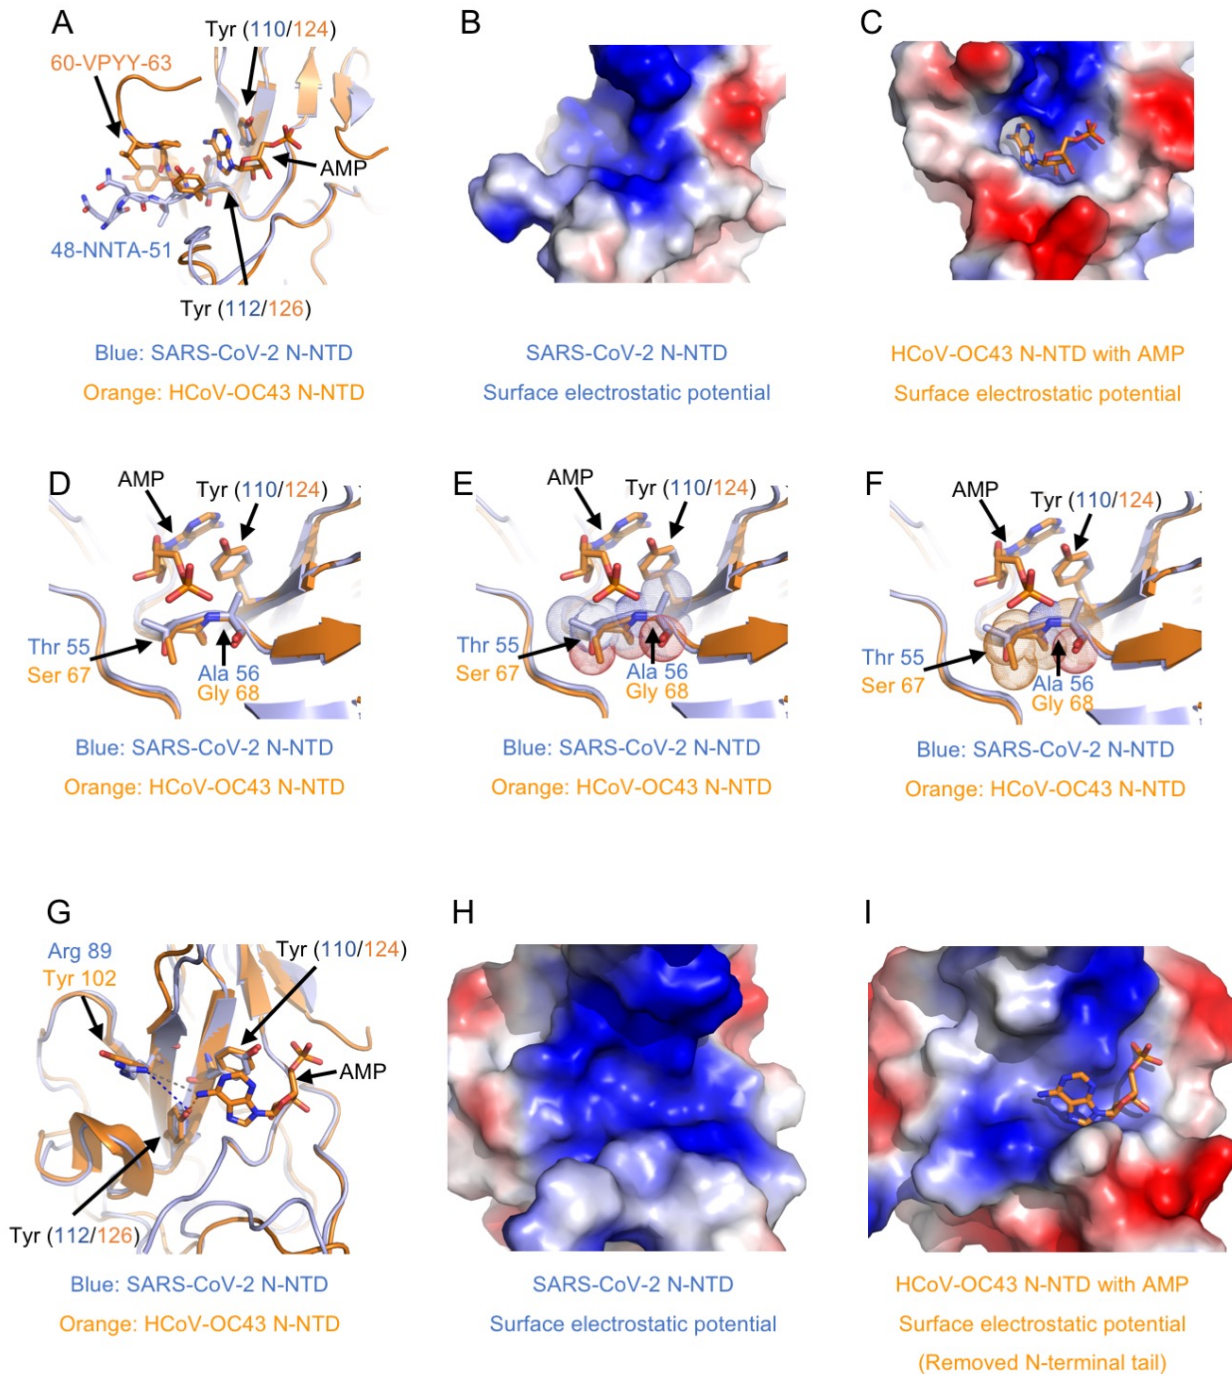

305 **Figure legend:** **A.** Detailed view of ribonucleotide binding pocket in superimposition structures  
306 between SARS-CoV-2 N-NTD with HCoV-OC43 N-NTD AMP complex. AMP, interacting  
307 residues and equivalents are highlighted with stick representation; **B.** Electrostatic surface of the  
308 potential ribonucleotide binding pocket on SARS-CoV-2 N-NTD; **C.** Electrostatic surface of the

309 ribonucleotide binding pocket on HCoV-OC43 N-NTD; **D.** Detailed view of phosphate group  
310 binding site in superimposition structures between SARS-CoV-2 N-NTD with HCoV-OC43 N-  
311 NTD AMP complex; **E.** Dot representation of SARS-CoV-2 residues Thr 55 and Ala 56, which  
312 indicates potential steric clashes with the ribonucleotide phosphate group; **F.** Dot representation  
313 of HCoV-OC43 N-NTD residues Ser 67 and Gly 68; **G.** Detailed view of nitrogenous base binding  
314 site in superimposition structures between SARS-CoV-2 N-NTD with HCoV-OC43 N-NTD AMP  
315 complex; **H.** Electrostatic surface of the potential ribonucleotide nitrogenous base binding  
316 pocket on SARS-CoV-2 N-NTD; **I.** Electrostatic surface of the ribonucleotide nitrogenous base  
317 binding pocket on HCoV-OC43 N-NTD. In electrostatic surface potential panels, blue denotes  
318 positive charge potential, while red indicates negative charge potential. The potential  
319 distribution was calculated by Pymol. The values range from -5 kT (red) to 0 (white) and to +5  
320 kT, where k is the Boltzmann constant and T is the temperature.

321 **Table 1 Data collection and refinement statistics.**

|                                         | <b>SARS-CoV-2 N-NTD</b>                               |
|-----------------------------------------|-------------------------------------------------------|
| <b>Protein Data Bank code</b>           | 6M3M                                                  |
| <b>Wavelength (Å)</b>                   | 1.5418                                                |
| <b>Resolution range</b>                 | 20.92 - 2.7 (2.796 - 2.7)                             |
| <b>Space group</b>                      | <i>P</i> 2 <sub>1</sub> 2 <sub>1</sub> 2 <sub>1</sub> |
| <b>Unit cell<br/>(a, b, c, a, b, g)</b> | 58.88, 92.68, 97.32, 90, 90, 90                       |
| <b>Total reflections</b>                | 98913 (10077)                                         |
| <b>Unique reflections</b>               | 15133 (1481)                                          |
| <b>Multiplicity</b>                     | 6.5 (6.8)                                             |
| <b>Completeness (%)</b>                 | 99.55 (99.80)                                         |
| <b>Mean I/sigma(I)</b>                  | 14.97 (2.9)                                           |
| <b>Wilson B-factor</b>                  | 33.94                                                 |
| <b>R-merge</b>                          | 0.1043 (0.3172)                                       |
| <b>R-meas</b>                           | 0.1135 (0.3436)                                       |
| <b>R-pim</b>                            | 0.04388 (0.1303)                                      |
| <b>CC1/2</b>                            | 0.991 (0.96)                                          |
| <b>CC*</b>                              | 0.998 (0.99)                                          |
| <b>Reflections used in refinement</b>   | 15126 (1481)                                          |
| <b>Reflections used for R-free</b>      | 1514 (138)                                            |

|                                     |                 |
|-------------------------------------|-----------------|
| <b>R-work</b>                       | 0.2578 (0.3551) |
| <b>R-free</b>                       | 0.2934 (0.4058) |
| <b>CC(work)</b>                     | 0.908 (0.692)   |
| <b>CC(free)</b>                     | 0.851 (0.635)   |
| <b>Number of non-hydrogen atoms</b> | 3952            |
| macromolecules                      | 3822            |
| solvent                             | 130             |
| <b>Protein residues</b>             | 499             |
| <b>RMS(bonds)</b>                   | 0.004           |
| <b>RMS(angles)</b>                  | 0.72            |
| <b>Ramachandran favored (%)</b>     | 96.48           |
| <b>Ramachandran allowed (%)</b>     | 3.52            |
| <b>Ramachandran outliers (%)</b>    | 0.00            |
| <b>Rotamer outliers (%)</b>         | 0.00            |
| <b>Clashscore</b>                   | 11.15           |
| <b>Average B-factor</b>             | 31.60           |
| macromolecules                      | 31.86           |
| solvent                             | 24.03           |



323 **Reference**

- 324 1. Brian DA & Baric RS. Coronavirus genome structure and replication. *Current Topics in*  
325 *Microbiology and Immunology* 2005; **287**:1-30.
- 326 2. Cui J, Li F & Shi ZL. Origin and evolution of pathogenic coronaviruses. *Nature Reviews*  
327 *Microbiology* 2019; **17**: 181-192.
- 328 3. Ramajayam R, Tan KP & Liang PH. Recent development of 3C and 3CL protease inhibitors  
329 for anti-coronavirus and anti-picornavirus drug discovery. *Biochemical Society Transactions*  
330 2011; **39**: 1371-1375.
- 331 4. Wrapp D, Wang N, Corbett KS, Goldsmith JA, Hsieh CL, Abiona O et al. Cryo-EM structure  
332 of the 2019-nCoV spike in the prefusion conformation. *Science* 2020.
- 333 5. Wan Y, Shang J, Sun S, Tai W, Chen J, Geng Q et al. Molecular Mechanism for Antibody-  
334 Dependent Enhancement of Coronavirus Entry. *J Virol* 2020; **94**.
- 335 6. Nelson GW, Stohlman SA & Tahara SM. High affinity interaction between nucleocapsid  
336 protein and leader/intergenic sequence of mouse hepatitis virus RNA. *Journal of General*  
337 *Virology* 2000; **81**: 181-188.
- 338 7. Stohlman SA, Baric RS, Nelson GN, Soe LH, Welter LM & Deans RJ. Specific interaction  
339 between coronavirus leader RNA and nucleocapsid protein. *Journal of Virology* 1988; **62**:  
340 4288-4295.
- 341 8. Cong YY, Ulasli M, Schepers H, Mauthe M, V'kovski P, Kriegenburg F et al. Nucleocapsid  
342 Protein Recruitment to Replication-Transcription Complexes Plays a Crucial Role in  
343 Coronaviral Life Cycle. *Journal of Virology* 2020; **94**.
- 344 9. Masters PS & Sturman LS. Background paper: Functions of the coronavirus nucleocapsid  
345 protein. *Advances in Experimental Medicine and Biology* 1990; **276**: 235-238.
- 346 10. McBride R, van Zyl M & Fielding BC. The Coronavirus Nucleocapsid Is a Multifunctional  
347 Protein. *Viruses-Basel* 2014; **6**: 2991-3018.
- 348 11. Tang TK, Wu MPJ, Chen ST, Hou MH, Hong MH, Pan FM et al. Biochemical and  
349 immunological studies of nucleocapsid proteins of severe acute respiratory syndrome and 229E  
350 human coronaviruses. *Proteomics* 2005; **5**: 925-937.
- 351 12. Du L, Zhao G, Lin Y, Chan C, He Y, Jiang S et al. Priming with rAAV encoding RBD of SARS-  
352 CoV S protein and boosting with RBD-specific peptides for T cell epitopes elevated humoral  
353 and cellular immune responses against SARS-CoV infection. *Vaccine* 2008; **26**: 1644-1651.
- 354 13. Surjit M, Liu B, Chow VTK & Lal SK. The nucleocapsid protein of severe acute respiratory

- 355 syndrome-coronavirus inhibits the activity of cyclin-cyclin-dependent kinase complex and  
356 blocks S phase progression in mammalian cells. *Journal of Biological Chemistry* 2006; **281**:  
357 10669-10681.
- 358 14. Hsieh PK, Chang SC, Huang CC, Lee TT, Hsiao CW, Kou YH et al. Assembly of severe acute  
359 respiratory syndrome coronavirus RNA packaging signal into virus-like particles is  
360 nucleocapsid dependent. *Journal of Virology* 2005; **79**: 13848-13855.
- 361 15. Ahmed SF, Quadeer AA & McKay MR. Preliminary Identification of Potential Vaccine Targets  
362 for the COVID-19 Coronavirus (SARS-CoV-2) Based on SARS-CoV Immunological Studies.  
363 *Viruses* 2020; **12**.
- 364 16. Liu SJ, Leng CH, Lien SP, Chi HY, Huang CY, Lin CL et al. Immunological characterizations  
365 of the nucleocapsid protein based SARS vaccine candidates. *Vaccine* 2006; **24**: 3100-3108.
- 366 17. Shang B, Wang XY, Yuan JW, Vabret A, Wu XD, Yang RF et al. Characterization and  
367 application of monoclonal antibodies against N protein of SARS-coronavirus. *Biochem*  
368 *Biophys Res Commun* 2005; **336**: 110-117.
- 369 18. Lin Y, Shen X, Yang RF, Li YX, Ji YY, He YY et al. Identification of an epitope of SARS-  
370 coronavirus nucleocapsid protein. *Cell Research* 2003; **13**: 141-145.
- 371 19. Lo YS, Lin SY, Wang SM, Wang CT, Chiu YL, Huang TH et al. Oligomerization of the  
372 carboxyl terminal domain of the human coronavirus 229E nucleocapsid protein. *FEBS Letters*  
373 2013; **587**: 120-127.
- 374 20. Chen IJ, Yuann JMP, Chang YM, Lin SY, Zhao J, Perlman S et al. Crystal structure-based  
375 exploration of the important role of Arg106 in the RNA-binding domain of human coronavirus  
376 OC43 nucleocapsid protein. *Biochimica et Biophysica Acta - Proteins and Proteomics* 2013;  
377 **1834**: 1054-1062.
- 378 21. Chang CK, Chen CMM, Chiang MH, Hsu YL & Huang TH. Transient Oligomerization of the  
379 SARS-CoV N Protein - Implication for Virus Ribonucleoprotein Packaging. *PLoS ONE* 2013;  
380 **8**.
- 381 22. Chang CK, Sue SC, Yu TH, Hsieh CM, Tsai CK, Chiang YC et al. Modular organization of  
382 SARS coronavirus nucleocapsid protein. *Journal of Biomedical Science* 2006; **13**: 59-72.
- 383 23. Wootton SK, Rowland RRR & Yoo D. Phosphorylation of the porcine reproductive and  
384 respiratory syndrome virus nucleocapsid protein. *Journal of Virology* 2002; **76**: 10569-10576.
- 385 24. Saikatendu KS, Joseph JS, Subramanian V, Neuman BW, Buchmeier MJ, Stevens RC et al.  
386 Ribonucleocapsid formation of severe acute respiratory syndrome coronavirus through  
387 molecular action of the N-terminal domain of N protein. *Journal of Virology* 2007; **81**: 3913-

- 388 3921.
- 389 25. Jayaram H, Fan H, Bowman BR, Ooi A, Jayaram J, Collisson EW et al. X-ray structures of the  
390 N- and C-terminal domains of a coronavirus nucleocapsid protein: Implications for  
391 nucleocapsid formation. *Journal of Virology* 2006; **80**: 6612-6620.
- 392 26. Fan H, Ooi A, Tan YW, Wang S, Fang S, Liu DX et al. The nucleocapsid protein of coronavirus  
393 infectious bronchitis virus: Crystal structure of its N-terminal domain and multimerization  
394 properties. *Structure* 2005; **13**: 1859-1868.
- 395 27. Grosseohme NE, Li L, Keane SC, Liu P, Dann Iii CE, Leibowitz JL et al. Coronavirus N Protein  
396 N-Terminal Domain (NTD) Specifically Binds the Transcriptional Regulatory Sequence (TRS)  
397 and Melts TRS-cTRS RNA Duplexes. *Journal of Molecular Biology* 2009; **394**: 544-557.
- 398 28. Keane SC, Lius P, Leibowitzs JL & Giedroc DP. Functional Transcriptional Regulatory  
399 Sequence (TRS) RNA binding and helix destabilizing determinants of Murine Hepatitis Virus  
400 (MHV) Nucleocapsid (N) protein. *Journal of Biological Chemistry* 2012; **287**: 7063-7073.
- 401 29. Tan YW, Fang S, Fan H, Lescar J & Liu DX. Amino acid residues critical for RNA-binding in  
402 the N-terminal domain of the nucleocapsid protein are essential determinants for the infectivity  
403 of coronavirus in cultured cells. *Nucleic Acids Research* 2006; **34**: 4816-4825.
- 404 30. Lin SM, Lin SC, Hsu JN, Chang CK, Chien CM, Wang YS et al. Structure-based stabilization  
405 of non-native protein-protein interactions of coronavirus nucleocapsid proteins in antiviral  
406 drug design. *J Med Chem* 2020.
- 407 31. Liebschner D, Afonine PV, Baker ML, Bunkoczi G, Chen VB, Croll TI et al. Macromolecular  
408 structure determination using X-rays, neutrons and electrons: recent developments in Phenix.  
409 *Acta Crystallographica Section D-Structural Biology* 2019; **75**: 861-877.
- 410 32. Wu F, Zhao S, Yu B, Chen YM, Wang W, Song ZG et al. A new coronavirus associated with  
411 human respiratory disease in China. *Nature* 2020.
- 412 33. de Wit E, van Doremalen N, Falzarano D & Munster VJ. SARS and MERS: recent insights  
413 into emerging coronaviruses. *Nat Rev Microbiol* 2016; **14**: 523-534.
- 414 34. Gorbalenya AE, Enjuanes L, Ziebuhr J & Snijder EJ. Nidovirales: Evolving the largest RNA  
415 virus genome. *Virus Research* 2006; **117**: 17-37.
- 416 35. Yu LL & Malik Peiris JS. Pathogenesis of severe acute respiratory syndrome. *Current Opinion*  
417 *in Immunology* 2005; **17**: 404-410.
- 418 36. Tan YJ, Lim SG & Hong W. Characterization of viral proteins encoded by the SARS-  
419 coronavirus genome. *Antiviral Research* 2005; **65**: 69-78.
- 420 37. Hatcher EL, Zhdanov SA, Bao Y, Blinkova O, Nawrocki EP, Ostapchuck Y et al. Virus

- 421 Variation Resource - improved response to emergent viral outbreaks. *Nucleic Acids Res* 2017;  
422 **45**: D482-D490.
- 423 38. Robert X & Gouet P. Deciphering key features in protein structures with the new ENDscript  
424 server. *Nucleic Acids Res* 2014; **42**: W320-324.
- 425 39. Sievers F, Wilm A, Dineen D, Gibson TJ, Karplus K, Li WZ et al. Fast, scalable generation of  
426 high-quality protein multiple sequence alignments using Clustal Omega. *Molecular Systems*  
427 *Biology* 2011; **7**.
- 428 40. Lin SY, Liu CL, Chang YM, Zhao JC, Perlman S & Hou MH. Structural Basis for the  
429 Identification of the N-Terminal Domain of Coronavirus Nucleocapsid Protein as an Antiviral  
430 Target. *Journal of Medicinal Chemistry* 2014; **57**: 2247-2257.
- 431 41. Zhu N, Zhang D, Wang W, Li X, Yang B, Song J et al. A Novel Coronavirus from Patients with  
432 Pneumonia in China, 2019. *N Engl J Med* 2020.
- 433 42. Zhou P, Yang XL, Wang XG, Hu B, Zhang L, Zhang W et al. A pneumonia outbreak associated  
434 with a new coronavirus of probable bat origin. *Nature* 2020.

435

436 **Supplementary Figures**

437 **Figure S1: Multiple sequence alignment of coronavirus nucleocapsid protein.**

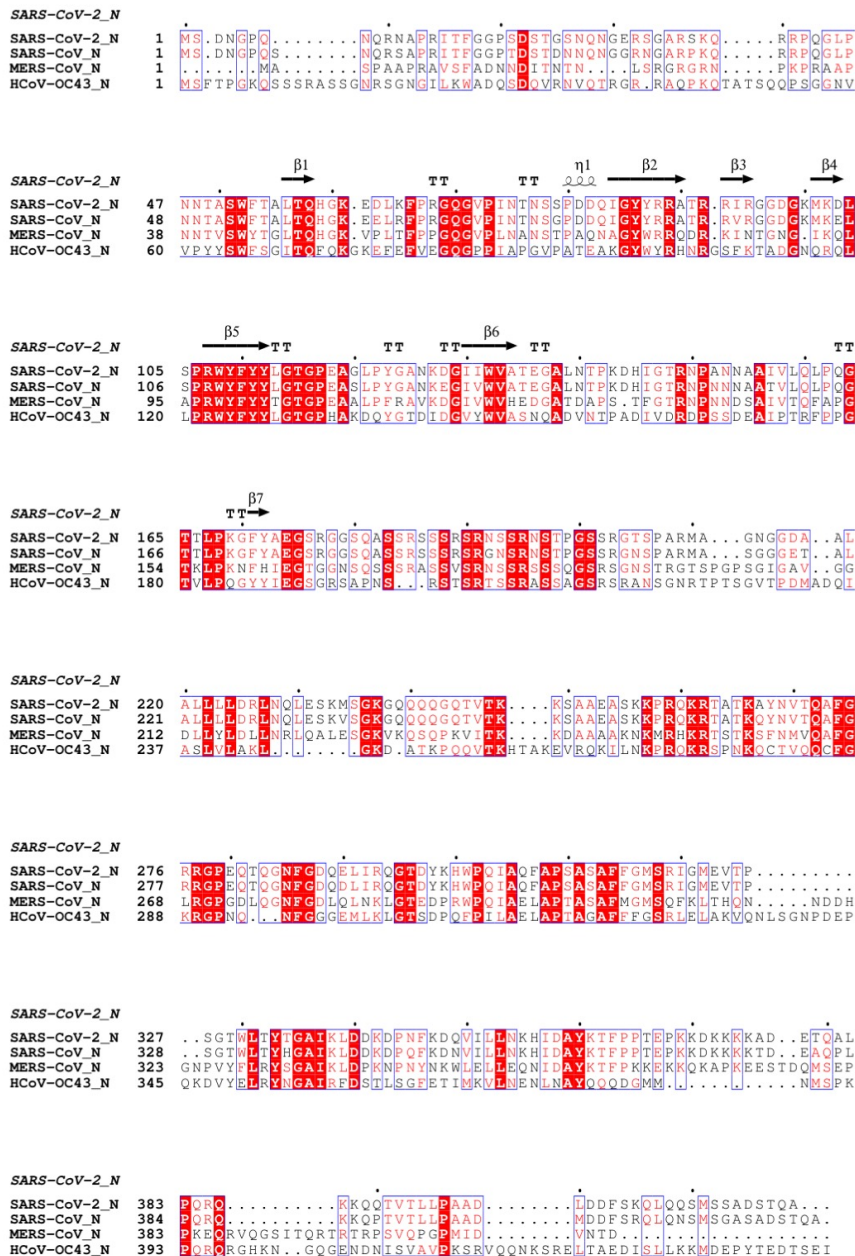

438 **Figure legend:** The alignment is accomplished at online server (Clustal Omega), and illustrated  
 439 with ESPrpt 3.0 server. The top line with SARS-CoV-2\_N label indicates secondary structure  
 440 elements extracted from structural coordinate.

441 **Figure S2: Full-length nucleocapsid protein purification.**

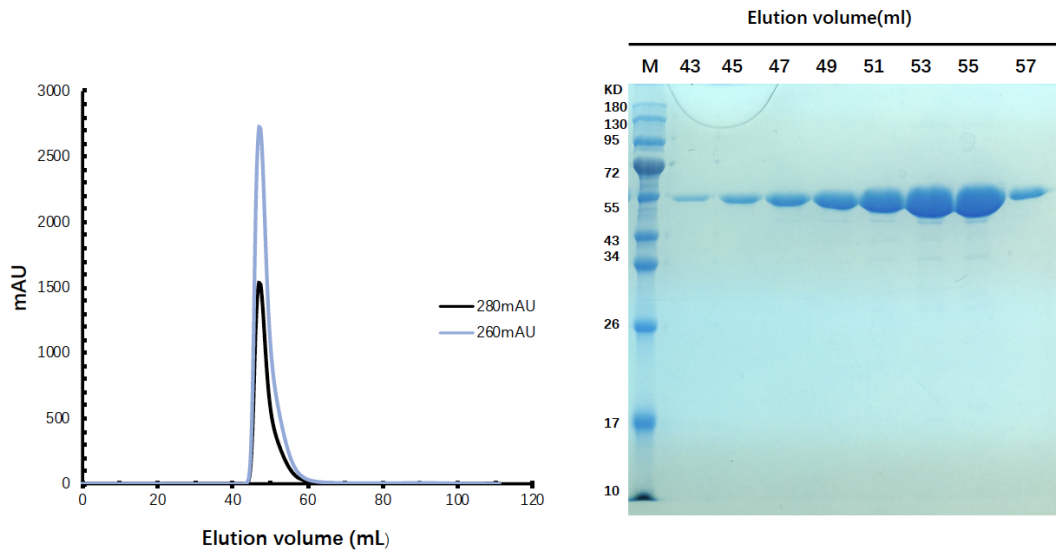

442 **Figure legend:** On the Left panel, a gel filtration chromatography result (HiLoad® Superdex®  
443 200 pg GE Healthcare) of recombinant full-length nucleocapsid protein. On the right panel, a  
444 12% SDS-PAGE electrophoresis is used to analyze the purification samples.

445 **Figure S3: Ribonucleotide binding pocket in HCoV-OC43 N-NTD AMP complex.**

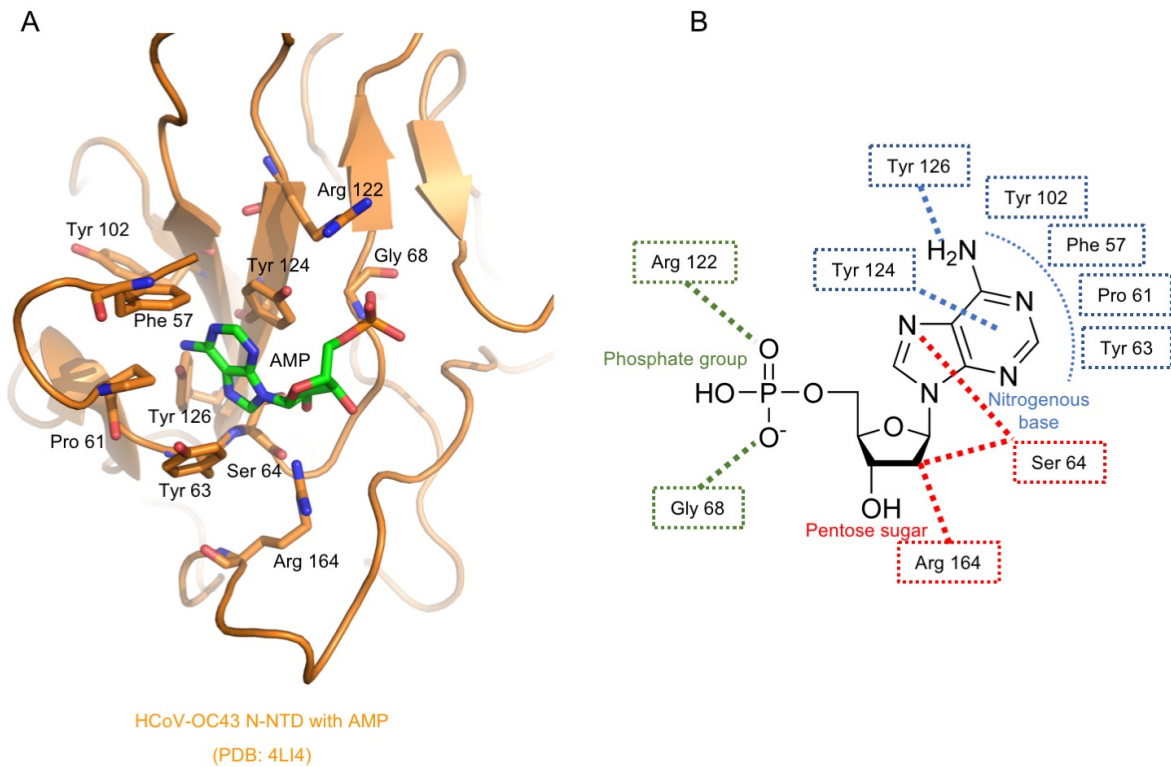

446 **Figure legend: A.** Detailed view of ribonucleotide binding pocket in HCoV-OC43 N-NTD AMP  
447 complex. AMP and its interacting residues are highlighted with stick representation; **B.** Simple  
448 illustration of AMP binding pocket. Nitrogenous base and its binding residues are color with  
449 blue. Pentose sugar and its binding residues are color with red. Phosphate group and its binding  
450 residues are color with green.

451 **Figure S4: *In vitro* SPR assays for SARS-CoV-2 N-NTD with ribonucleotides.**

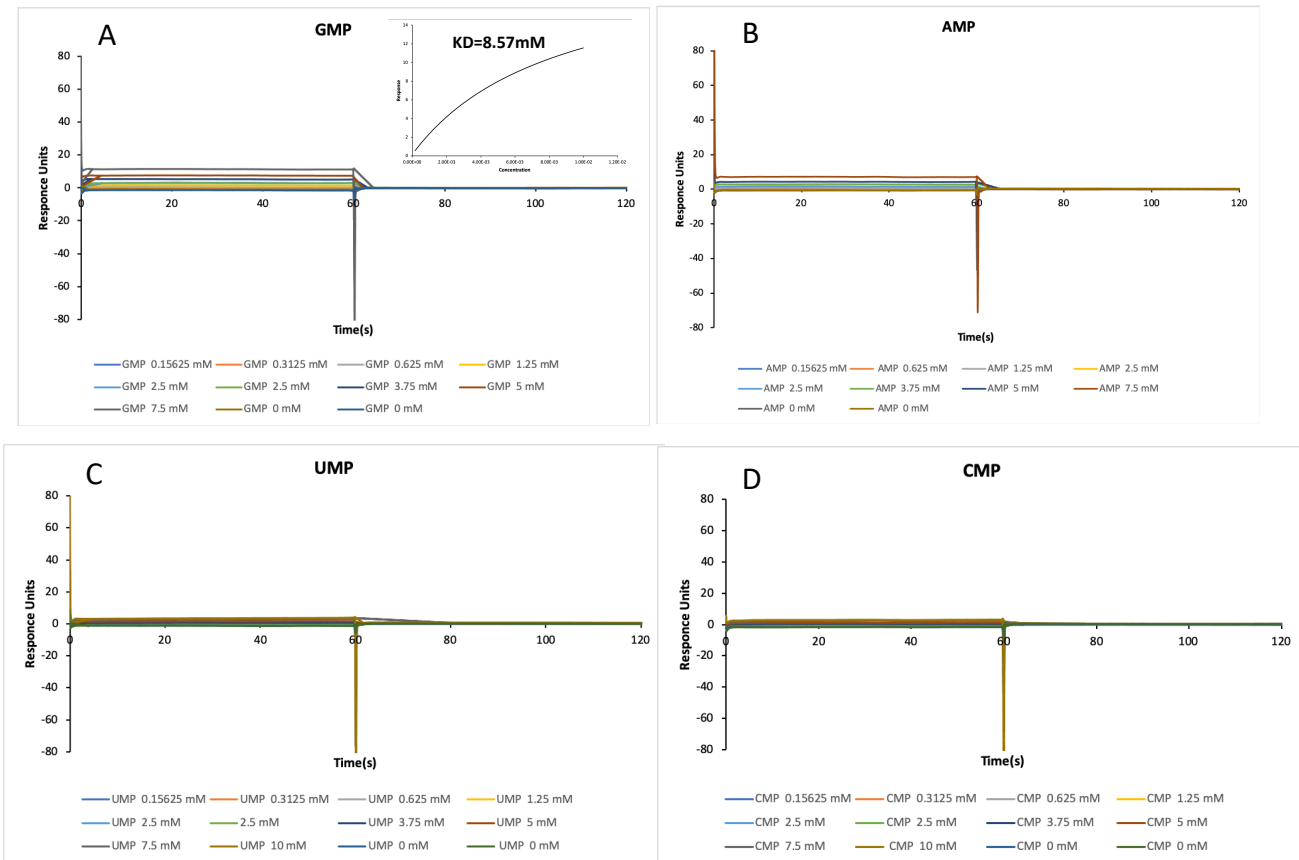

452 **Figure legend: A.** SPR sensorgram of the binding of varying concentrations of GMP (0, 0.15625,  
453 0.3125, 0.625, 1.25, 2.5, 3.75, 5, 7.5 mM) to SARS-CoV-2 N-NTD captured CM5 chip. The curve  
454 in up-right box represents the binding affinity by fitting the sensorgram to a Langmuir binding  
455 rate equations. The similar SPR sensorgrams of the binding of AMP, UMP, and CMP are shown  
456 in panel **B**, **C**, and **D**, respectively.
